# Supplementary material for: Quantitative and Longitudinal Assessment of Systemic Innate Immunity in Health and Disease Using a 2D Gene Model
Source: Biomedicines. 2024 Apr 27;12(5):969. doi: 10.3390/biomedicines12050969 (PMC11117654; doi:10.3390/biomedicines12050969)
Supplement: Supplementary file 1 [file biomedicines-12-00969-s001.zip › Supplementary Table.xlsx]

## Sheet: Sheet1
Supplementary Table S1. P values for the group comparisons described in the main text.
Accession ID	Parameter	Group comparison	P value
GSE161731	VirSig	Influenza-Healthy	<1.0e-7
		Influenza-Bacterial	<1.0e-7
		Healthy-Bacterial	0.3
	BacSig	Healthy-Bacterial	<1.0e-7
		Influenza-Bacterial	<1.0e-7
		Influenza-Healthy	0.96
GSE176262	VirSig	Influenza-Healthy	<1.0e-7
		Influenza-Bacterial	<1.0e-7
		Healthy-Bacterial	0.11
	BacSig	Healthy-Bacterial	<1.0e-7
		Influenza-Bacterial	<1.0e-7
		Influenza-Healthy	0.004
GSE158163	VirSig	pharyngitis by GAS-Control	0.41
		pharyngitis by GAS-GAS colonized	0.38
		GAS colonized-Control	0.91
	BacSig	pharyngitis by GAS-Control	7e-07
		pharyngitis by GAS-GAS colonized	6.4e-05
		GAS colonized-Control	0.99
GSE72946	VirSig	control-acute	0.7
		convalescence-acute	0.07
		convalescence-control	0.75
	BacSig	control-acute	1e-07
		convalescence-acute	<1.0e-7
		convalescence-control	0.98
GSE143549	VirSig	Healthy - Ebola survivor	0.00048
	BacSig	Healthy - Ebola survivor	0.22
GSE98139	VirSig	Healthy - CFS	0.92
	BacSig	Healthy - CFS	0.079
GSE231409	VirSig	A05-10Y-A00-05Y	1
		A10-15Y-A00-05Y	0.53
		A15-20Y-A00-05Y	0.92
		A20-90Y-A00-05Y	0.96
		A10-15Y-A05-10Y	0.56
		A15-20Y-A05-10Y	0.97
		A20-90Y-A05-10Y	0.99
		A15-20Y-A10-15Y	0.91
		A20-90Y-A10-15Y	0.81
		A20-90Y-A15-20Y	1
	BacSig	A05-10Y-A00-05Y	0.87
		A10-15Y-A00-05Y	0.97
		A15-20Y-A00-05Y	0.045
		A20-90Y-A00-05Y	0.07
		A10-15Y-A05-10Y	0.99
		A15-20Y-A05-10Y	0.14
		A20-90Y-A05-10Y	0.22
		A15-20Y-A10-15Y	0.046
		A20-90Y-A10-15Y	0.078
		A20-90Y-A15-20Y	1
GSE134080	VirSig	Male - Female	0.036
	BacSig	Male - Female	0.055
GSE108497	VirSig	P01-15W-Non-pregnant	0.89
		P16-40W-Non-pregnant	0.24
		Postpartum-Non-pregnant	0.97
		P16-40W-P01-15W	0.58
		Postpartum-P01-15W	1
		Postpartum-P16-40W	0.69
	BacSig	P01-15W-Non-pregnant	<1.0e-7
		P16-40W-Non-pregnant	<1.0e-7
		Postpartum-Non-pregnant	0.89
		P16-40W-P01-15W	<1.0e-7
		Postpartum-P01-15W	<1.0e-7
		Postpartum-P16-40W	<1.0e-7
GSE107995	VirSig	Control-active TB	<1.0e-7
		LTBI-active TB	<1.0e-7
		LTBI-Control	0.43
	BacSig	Control-active TB	<1.0e-7
		LTBI-active TB	<1.0e-7
		LTBI-Control	1
GSE157657	VirSig	TB - Control	4.4e-11
	BacSig	TB - Control	1.6e-05
GSE89403	VirSig	TB - Control	2e-05
	BacSig	TB - Control	3.2e-08
	VirSig	W01-DX	0.01
		W04-DX	0.11
		W24-DX	3.5e-06
		W04-W01	0.81
		W24-W01	0.23
		W24-W04	0.026
	BacSig	W01-DX	0.00019
		W04-DX	<1.0e-7
		W24-DX	<1.0e-7
		W04-W01	0.13
		W24-W01	0.00019
		W24-W04	0.18
GSE124548	VirSig	P_Base-Control	0.8
		P_V2-Control	0.82
		P_V2-P_Base	1
	BacSig	P_Base-Control	0.001
		P_V2-Control	0.0022
		P_V2-P_Base	0.97
GSE181228	VirSig	P_CYC-Control	1e-07
		P_MMF-Control	9.3e-06
		P_MMF-P_CYC	0.62
	BacSig	P_CYC-Control	0.003
		P_MMF-Control	0.00026
		P_MMF-P_CYC	0.69
	VirSig	Baseline - Month 12 (MMF group)	0.78
	BacSig	Baseline - Month 12 (MMF group)	0.12
	VirSig	Baseline - Month 12 (CYC group)	0.0056
	BacSig	Baseline - Month 12 (CYC group)	6.1e-08
GSE72509	VirSig	SLE_high-control	<1.0e-7
		SLE_med-control	<1.0e-7
		SLE_none-control	2.7e-05
		SLE_med-SLE_high	0.97
		SLE_none-SLE_high	0.00032
		SLE_none-SLE_med	0.0026
	BacSig	SLE_high-control	0.09
		SLE_med-control	0.00031
		SLE_none-control	0.0045
		SLE_med-SLE_high	0.19
		SLE_none-SLE_high	0.85
		SLE_none-SLE_med	0.43
